# Supplementary material for: Synthesis of Novel Carborane-Containing Derivatives of RGD Peptide
Source: MDPI journal article supplement (doi:10.3390/molecules28083467), 2023-04-14
Supplement: s1 [file s1]

# Supplementary Materials

## Synthesis of Novel Carborane-containing Derivatives of RGD Peptide

Alexander V. Vakhrushev <sup>1</sup>, Dmitry A. Gruzdev <sup>1,\*</sup>, Alexander M. Demin <sup>1</sup>, Galina L. Levit <sup>1</sup>, and Victor P. Krasnov <sup>1,\*</sup>

<sup>1</sup> Postovsky Institute of Organic Synthesis, Russian Academy of Sciences (Ural Branch), Ekaterinburg 620108, Russia

| Table of Contents                                                           | Page |
|-----------------------------------------------------------------------------|------|
| NMR Spectra .....                                                           | S2   |
| <b>Figure S1.</b> <sup>1</sup> H NMR spectrum of compound <b>4</b> .....    | S2   |
| <b>Figure S2.</b> <sup>13</sup> C NMR spectrum of compound <b>4</b> .....   | S2   |
| <b>Figure S3.</b> <sup>1</sup> H NMR spectrum of compound <b>5</b> .....    | S3   |
| <b>Figure S4.</b> <sup>13</sup> C NMR spectrum of compound <b>5</b> .....   | S3   |
| <b>Figure S5.</b> <sup>1</sup> H NMR spectrum of compound <b>6</b> .....    | S4   |
| <b>Figure S6.</b> <sup>13</sup> C NMR spectrum of compound <b>6</b> .....   | S4   |
| <b>Figure S7.</b> <sup>1</sup> H NMR spectrum of compound <b>7</b> .....    | S5   |
| <b>Figure S8.</b> <sup>13</sup> C NMR spectrum of compound <b>7</b> .....   | S5   |
| <b>Figure S9.</b> <sup>1</sup> H NMR spectrum of compound <b>2c</b> .....   | S6   |
| <b>Figure S10.</b> <sup>13</sup> C NMR spectrum of compound <b>2c</b> ..... | S6   |
| <b>Figure S11.</b> <sup>1</sup> H NMR spectrum of compound <b>1a</b> .....  | S7   |
| <b>Figure S12.</b> <sup>11</sup> B NMR spectrum of compound <b>1a</b> ..... | S7   |
| <b>Figure S13.</b> <sup>13</sup> C NMR spectrum of compound <b>1a</b> ..... | S8   |
| <b>Figure S14.</b> <sup>1</sup> H NMR spectrum of compound <b>1b</b> .....  | S8   |
| <b>Figure S15.</b> <sup>11</sup> B NMR spectrum of compound <b>1b</b> ..... | S9   |
| <b>Figure S16.</b> <sup>13</sup> C NMR spectrum of compound <b>1b</b> ..... | S9   |
| <b>Figure S17.</b> <sup>1</sup> H NMR spectrum of compound <b>1c</b> .....  | S10  |
| <b>Figure S18.</b> <sup>11</sup> B NMR spectrum of compound <b>1c</b> ..... | S10  |
| <b>Figure S19.</b> <sup>13</sup> C NMR spectrum of compound <b>1c</b> ..... | S11  |
| HPLC Data .....                                                             | S12  |
| <b>Figure S20.</b> HPLC of compound <b>4</b> .....                          | S12  |
| <b>Figure S21.</b> HPLC of compound <b>6</b> .....                          | S12  |
| <b>Figure S22.</b> HPLC of compound <b>7</b> .....                          | S13  |
| <b>Figure S23.</b> HPLC of compound <b>2c</b> .....                         | S13  |
| <b>Figure S24.</b> HPLC of compound <b>1a</b> .....                         | S14  |
| <b>Figure S25.</b> HPLC of compound <b>1b</b> .....                         | S14  |
| <b>Figure S26.</b> HPLC of compound <b>1c</b> .....                         | S15  |

## NMR Spectra

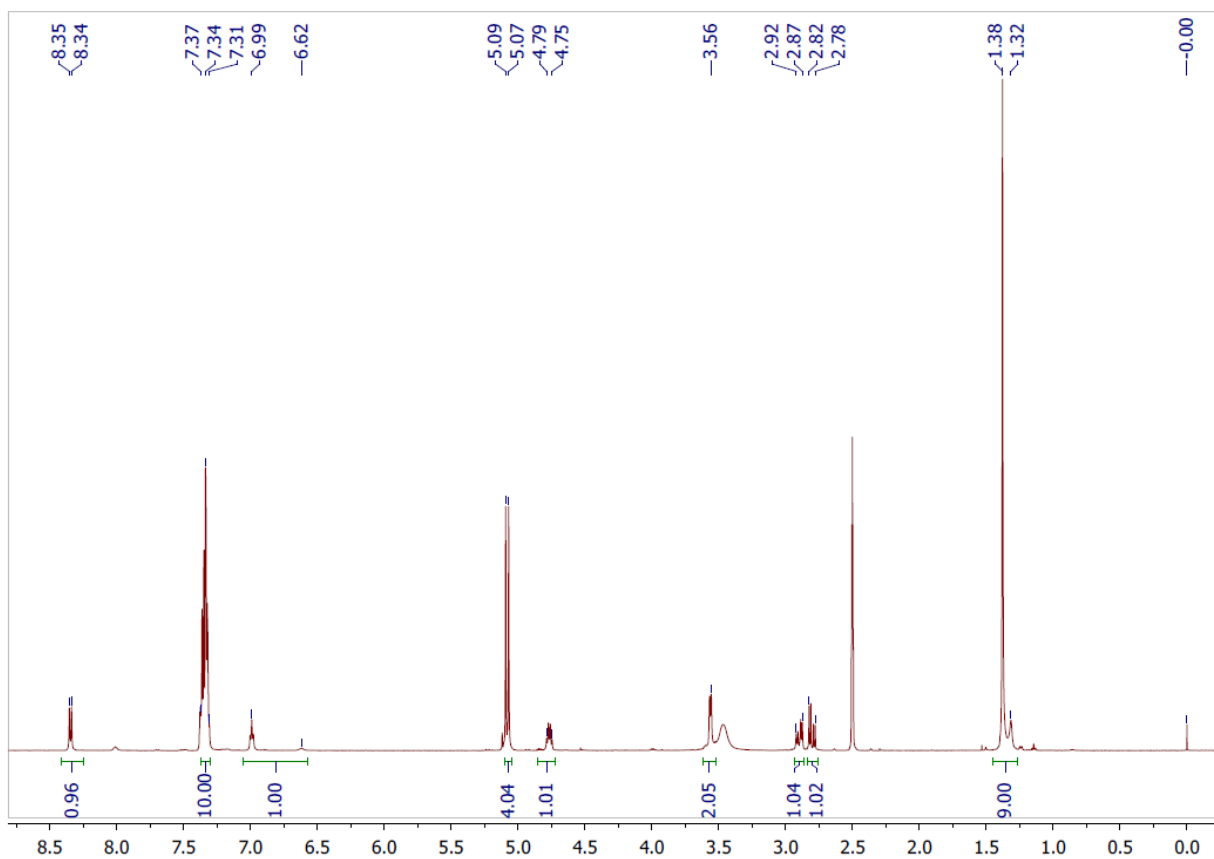

Figure S1. <sup>1</sup>H NMR spectrum of compound 4

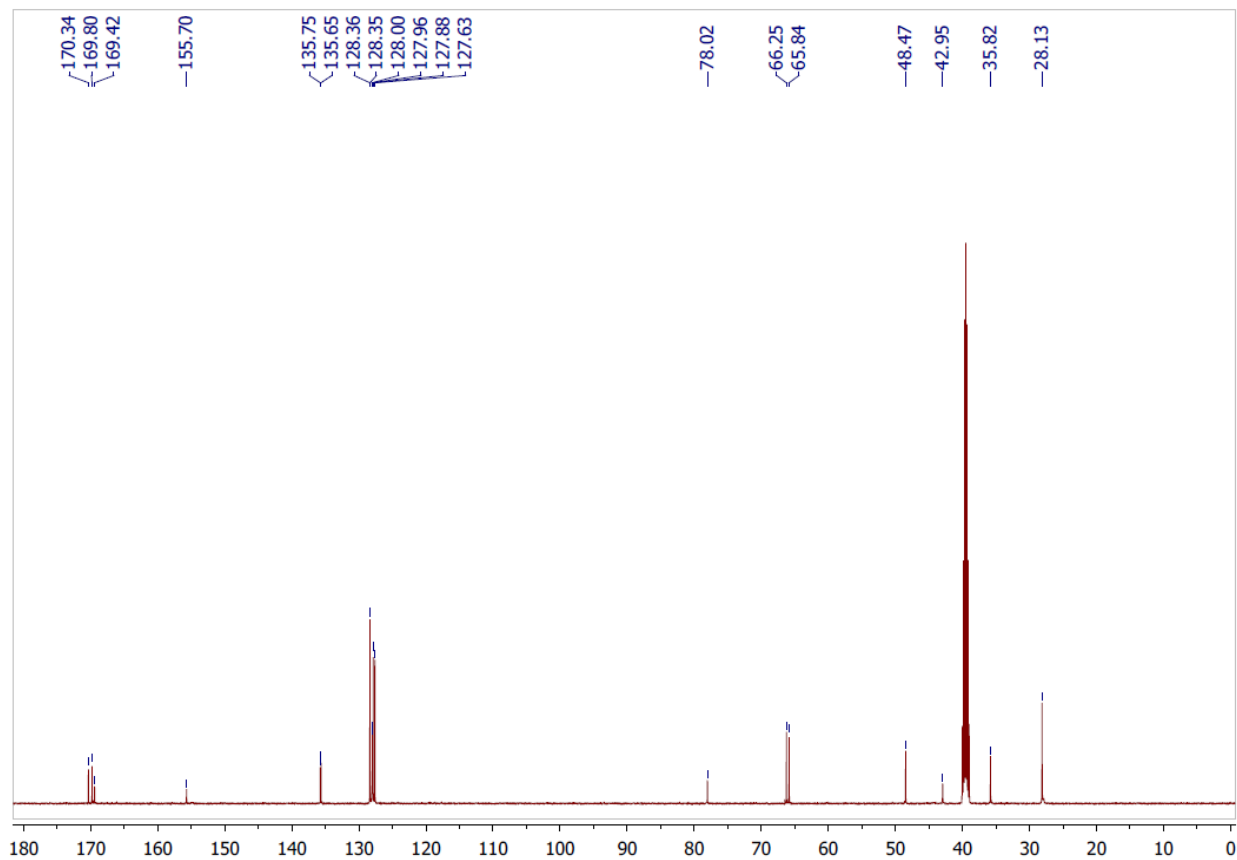

Figure S2. <sup>13</sup>C NMR spectrum of compound 4

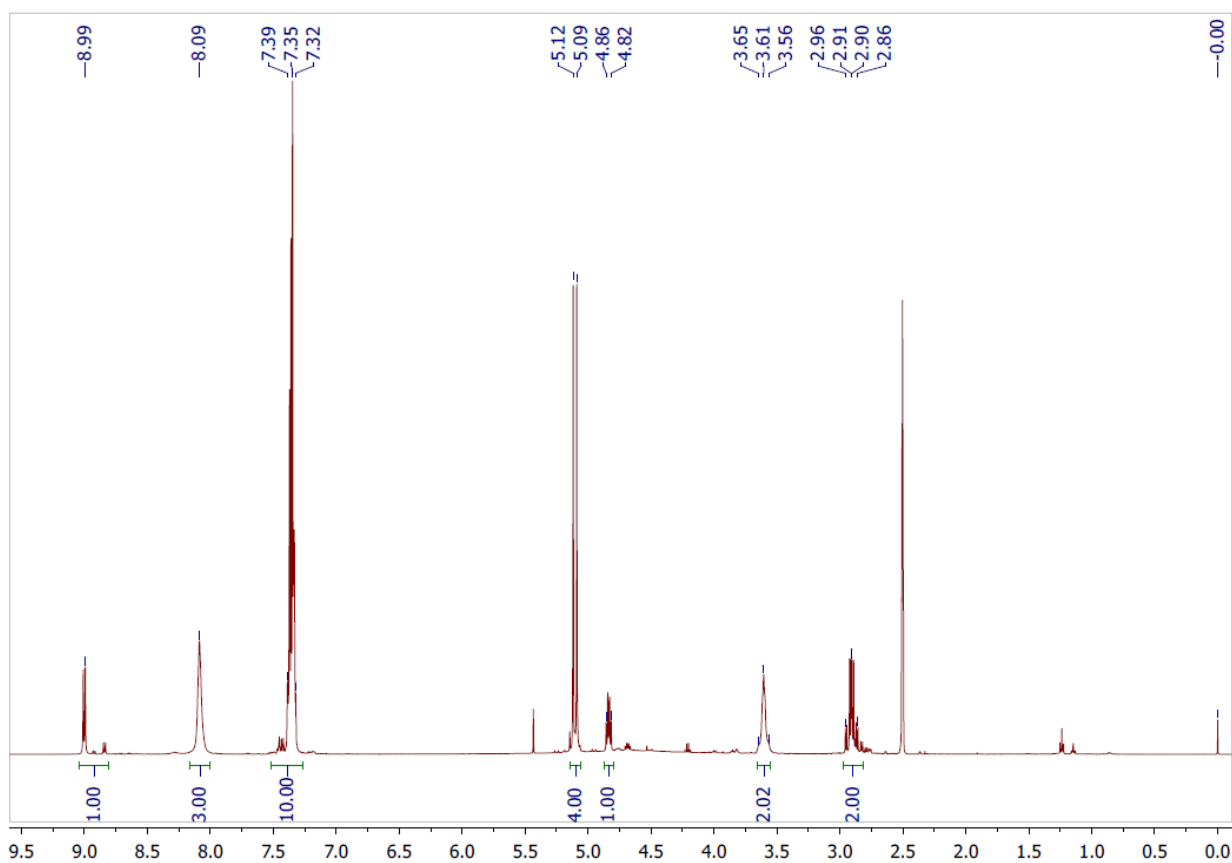

**Figure S3.** <sup>1</sup>H NMR spectrum of compound 5

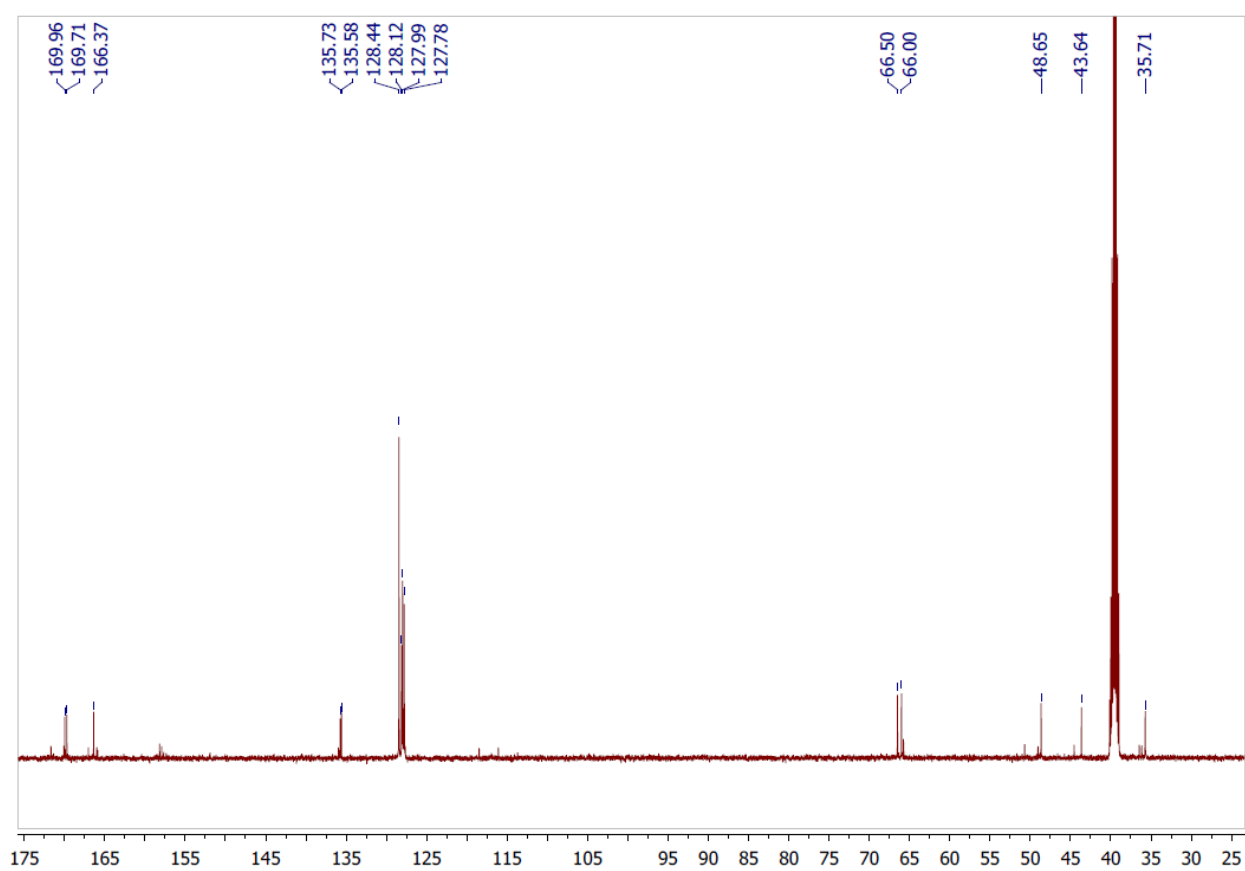

**Figure S4.** <sup>13</sup>C NMR spectrum of compound 5

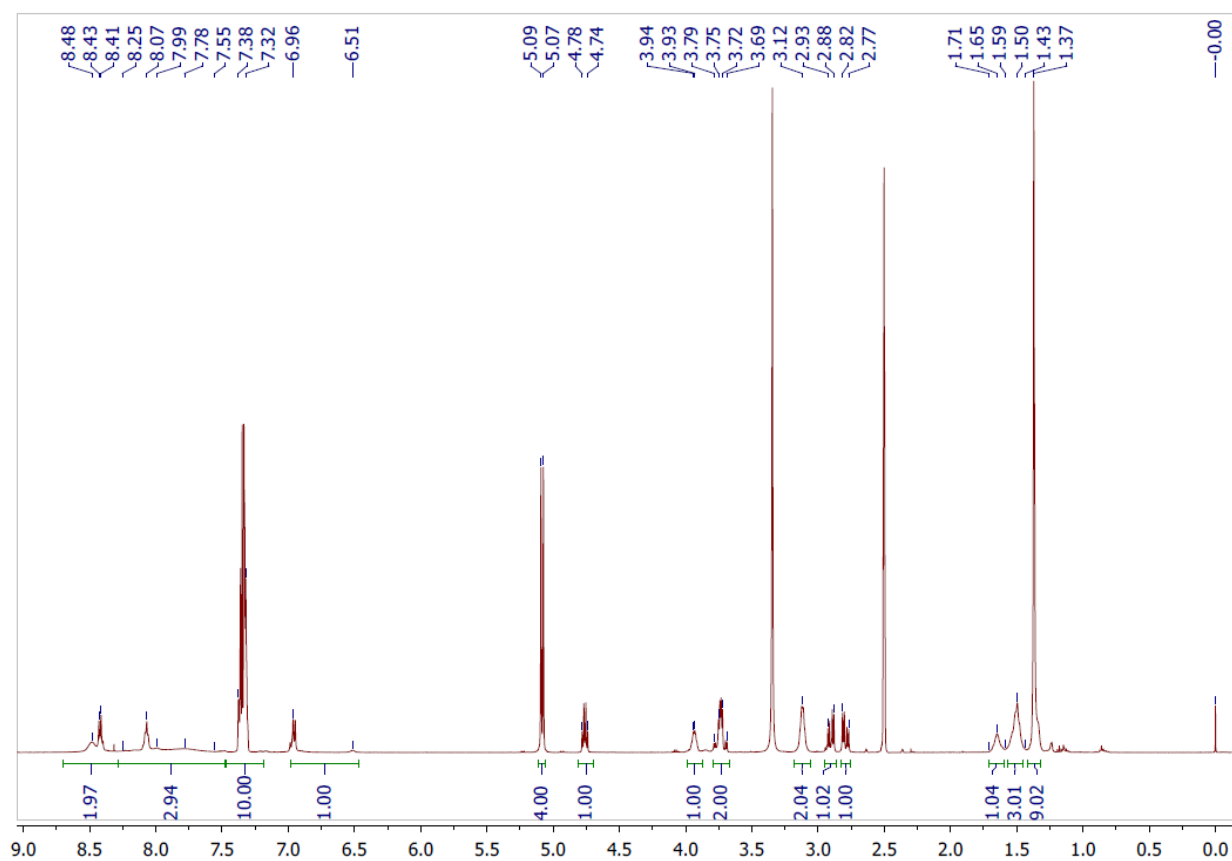

**Figure S5.  $^1\text{H}$  NMR spectrum of compound 6**

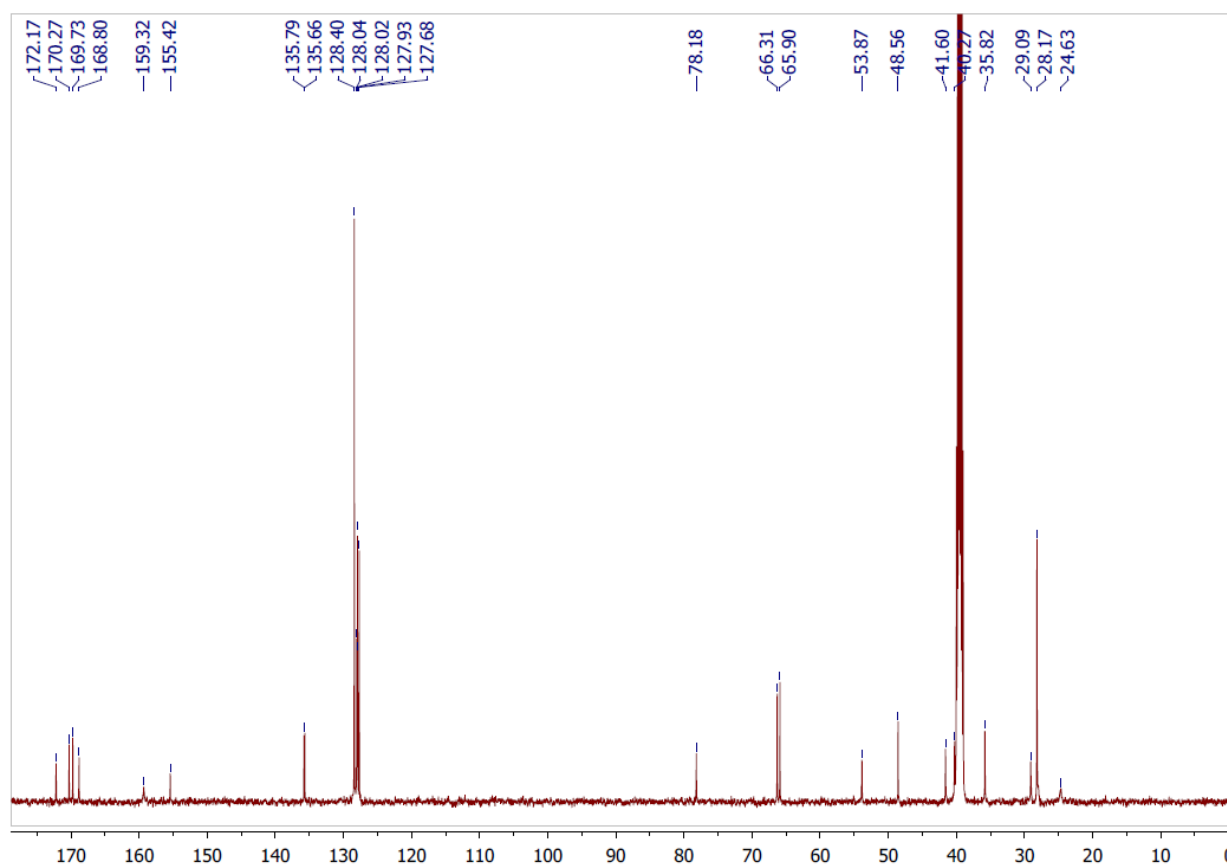

**Figure S6.  $^{13}\text{C}$  NMR spectrum of compound 6**

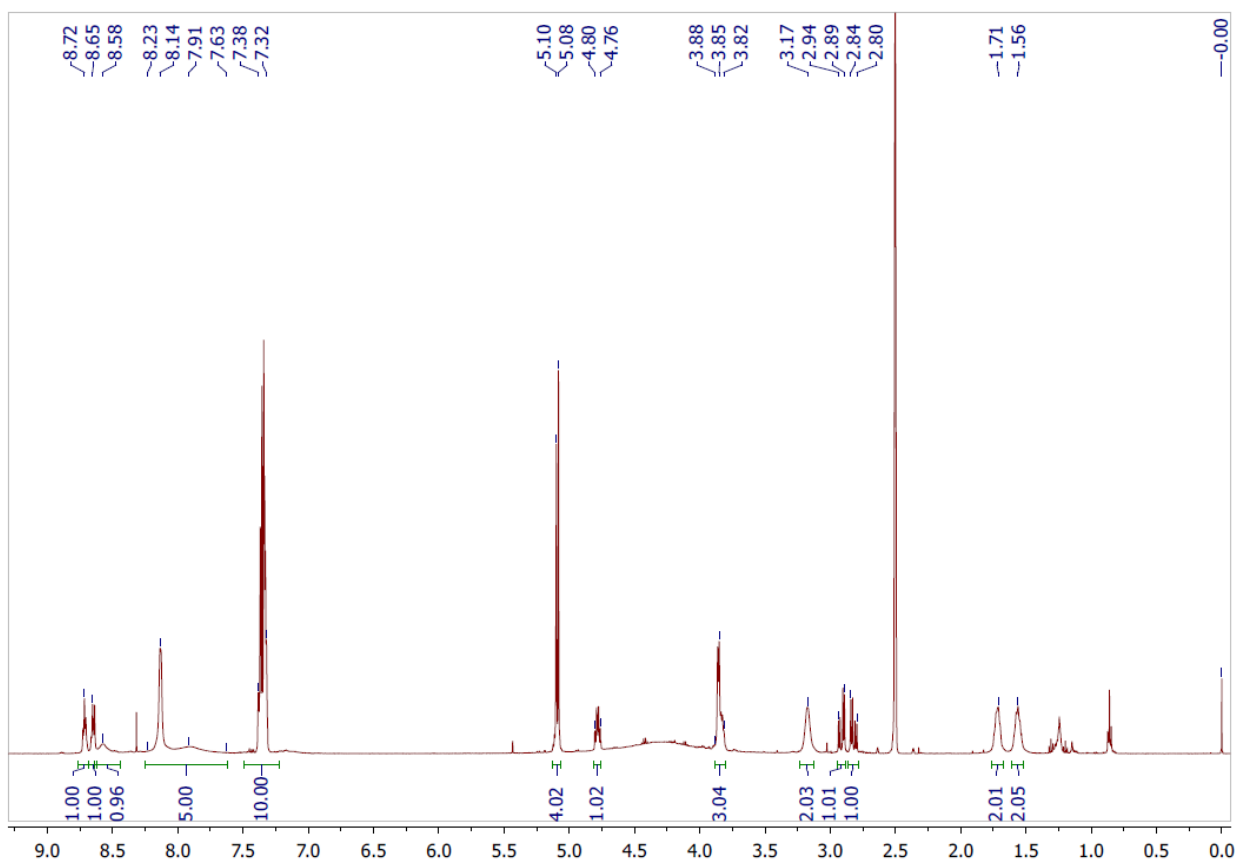

**Figure S7.  $^1\text{H}$  NMR spectrum of compound 7**

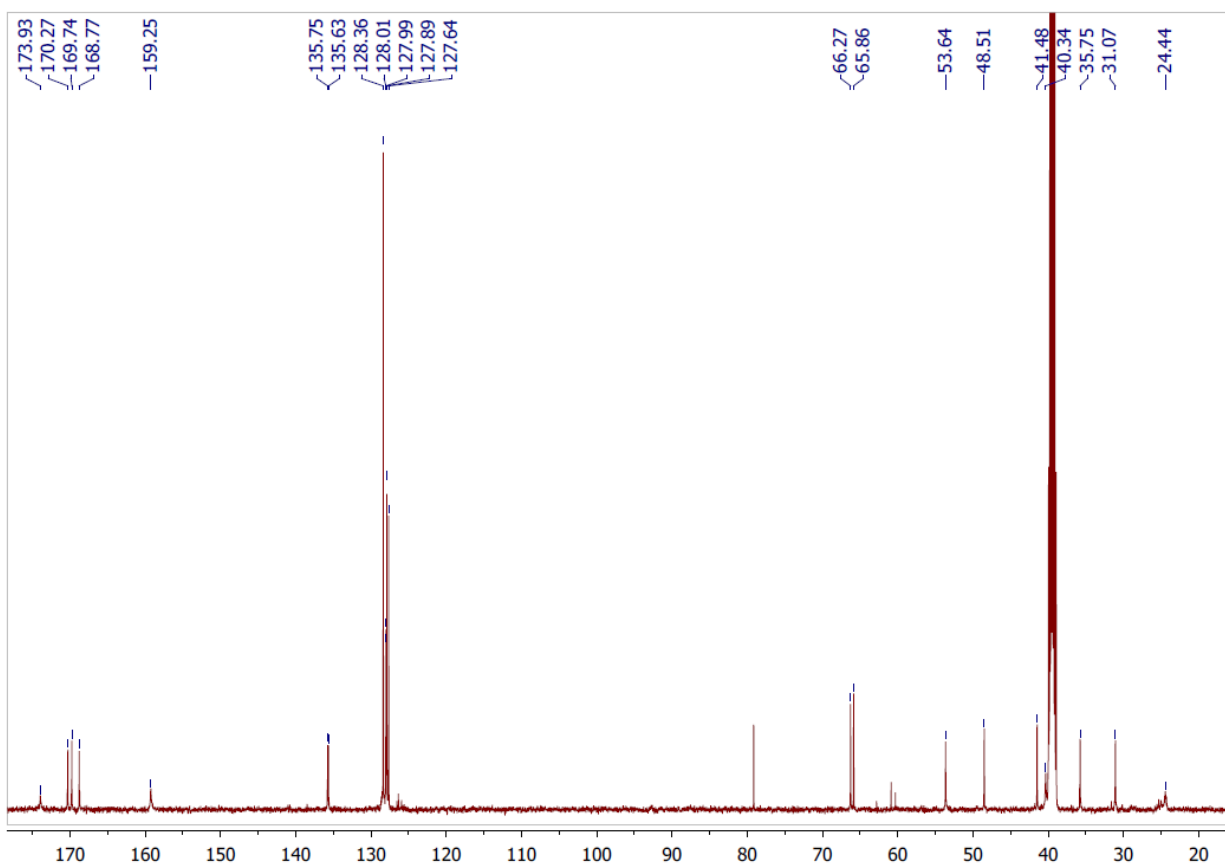

**Figure S8.  $^{13}\text{C}$  NMR spectrum of compound 7**

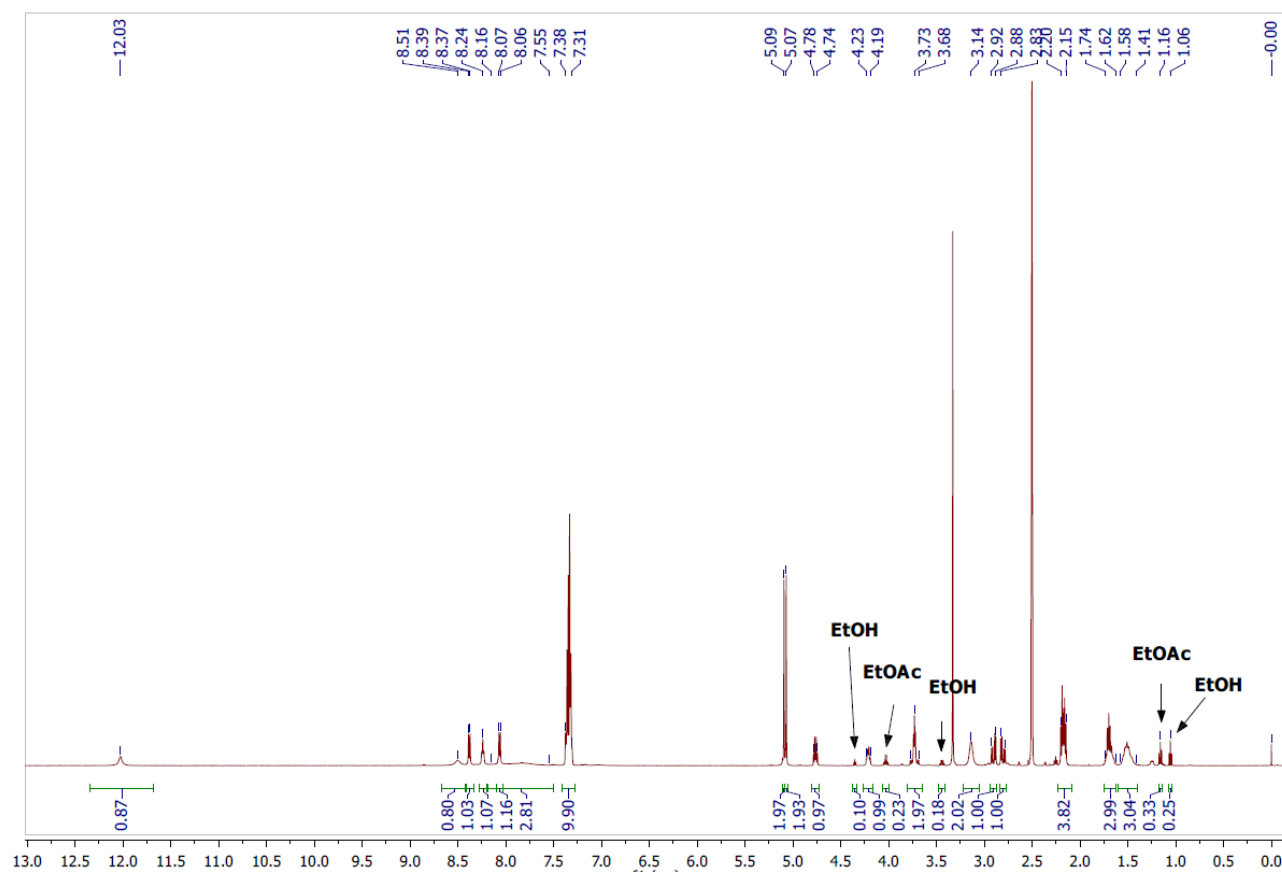

Figure S9.  $^1\text{H}$  NMR spectrum of compound **2c**

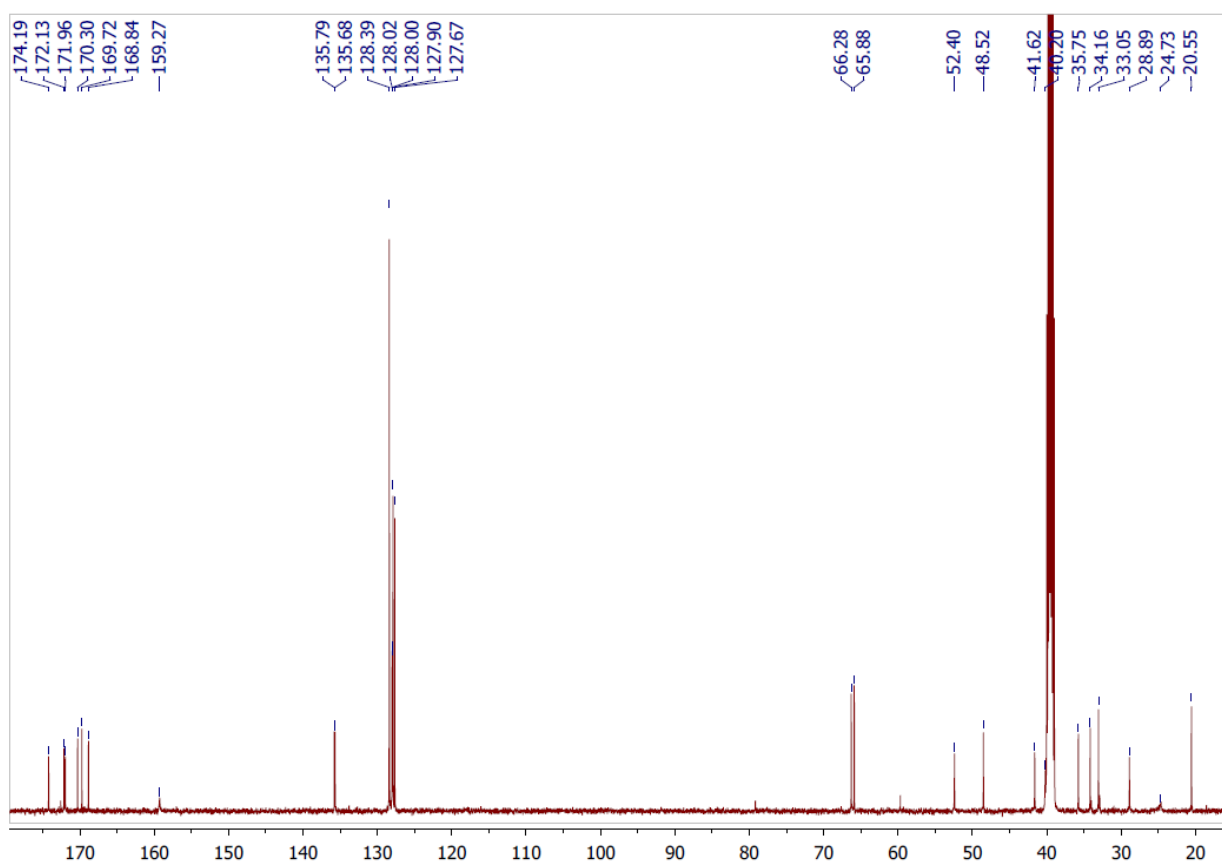

Figure S10.  $^{13}\text{C}$  NMR spectrum of compound **2c**

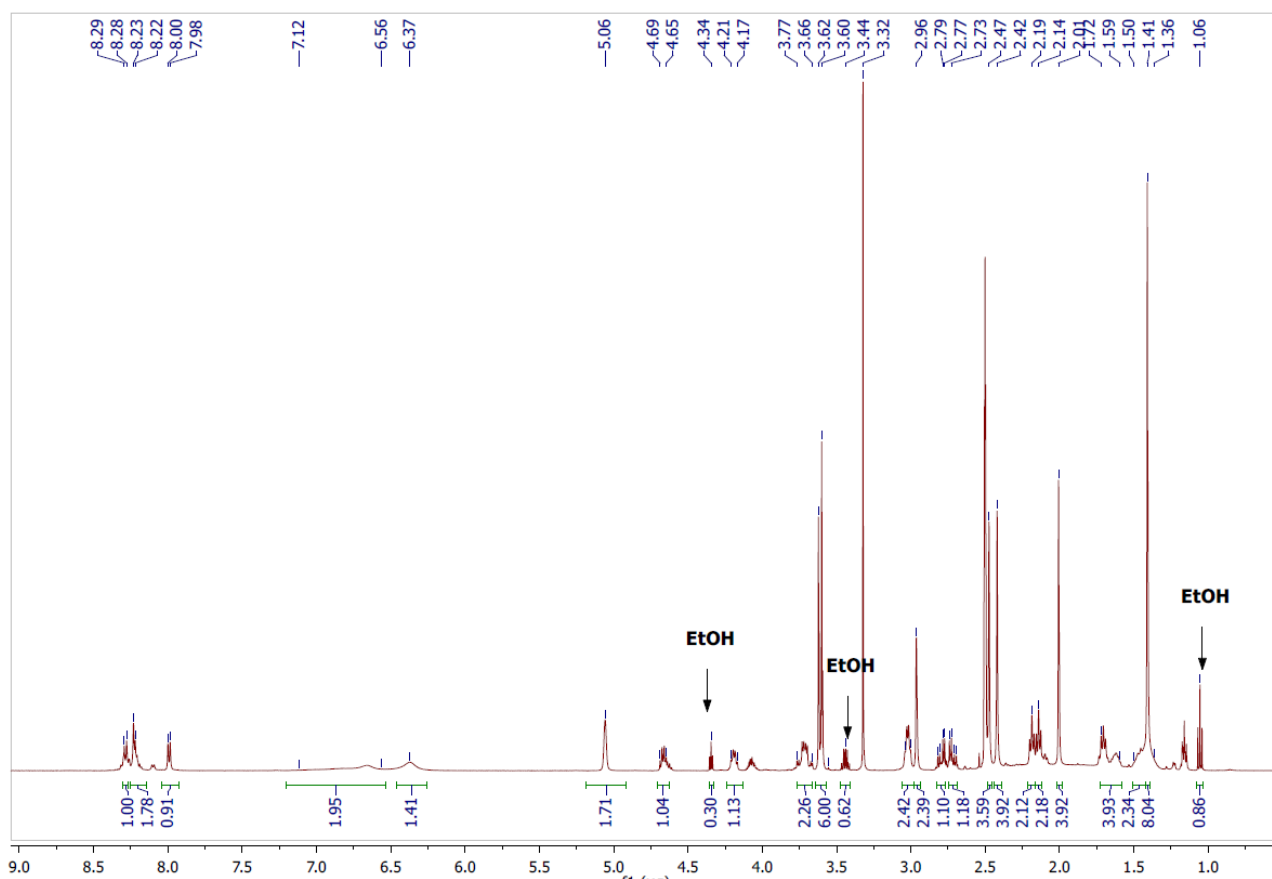

**Figure S11.** <sup>1</sup>H NMR spectrum of compound **1a**

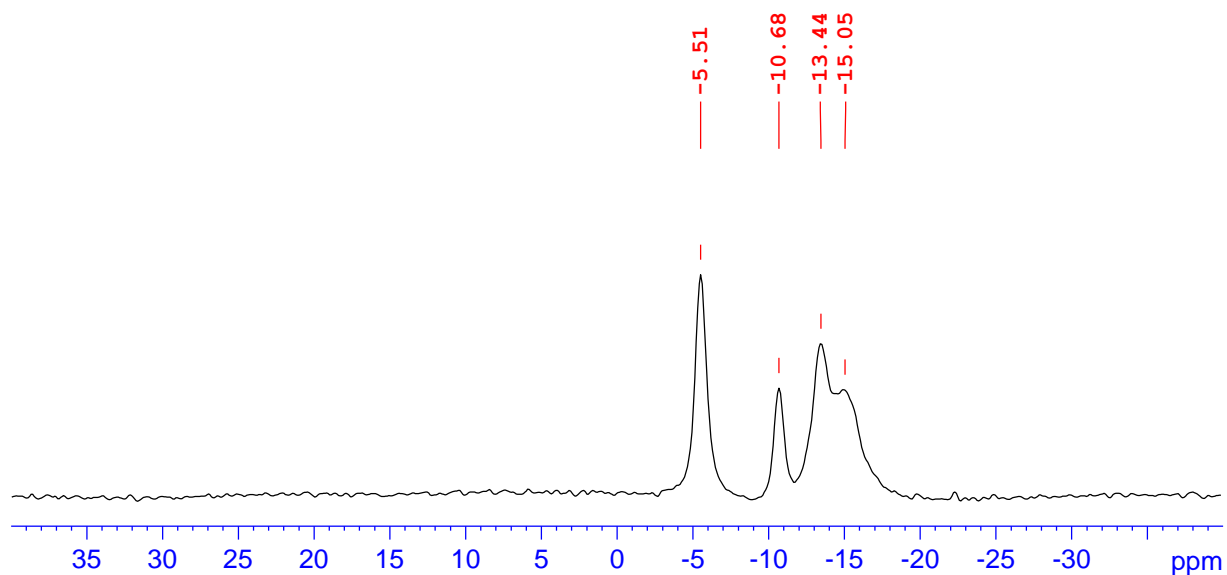

**Figure S12.** <sup>11</sup>B NMR spectrum of compound **1a**

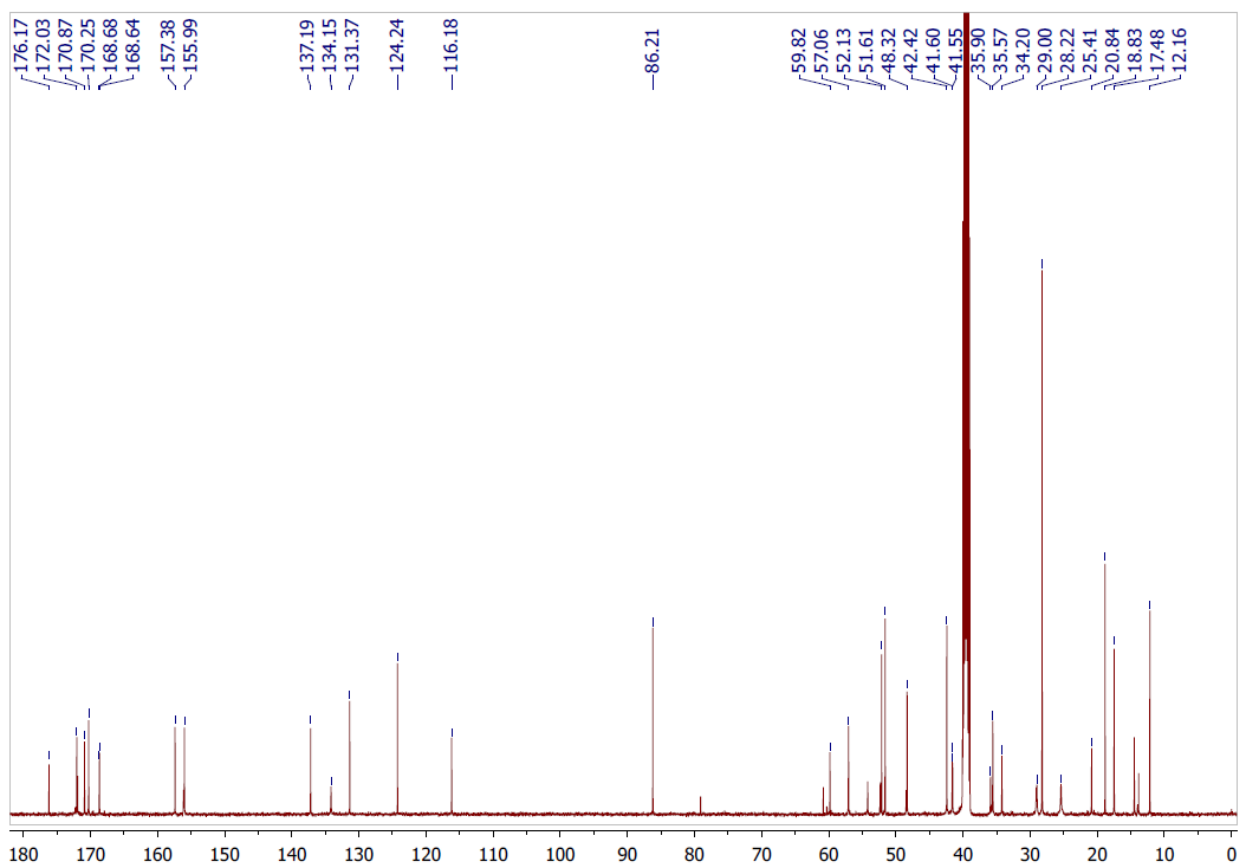

Figure S13. <sup>13</sup>C NMR spectrum of compound **1a**

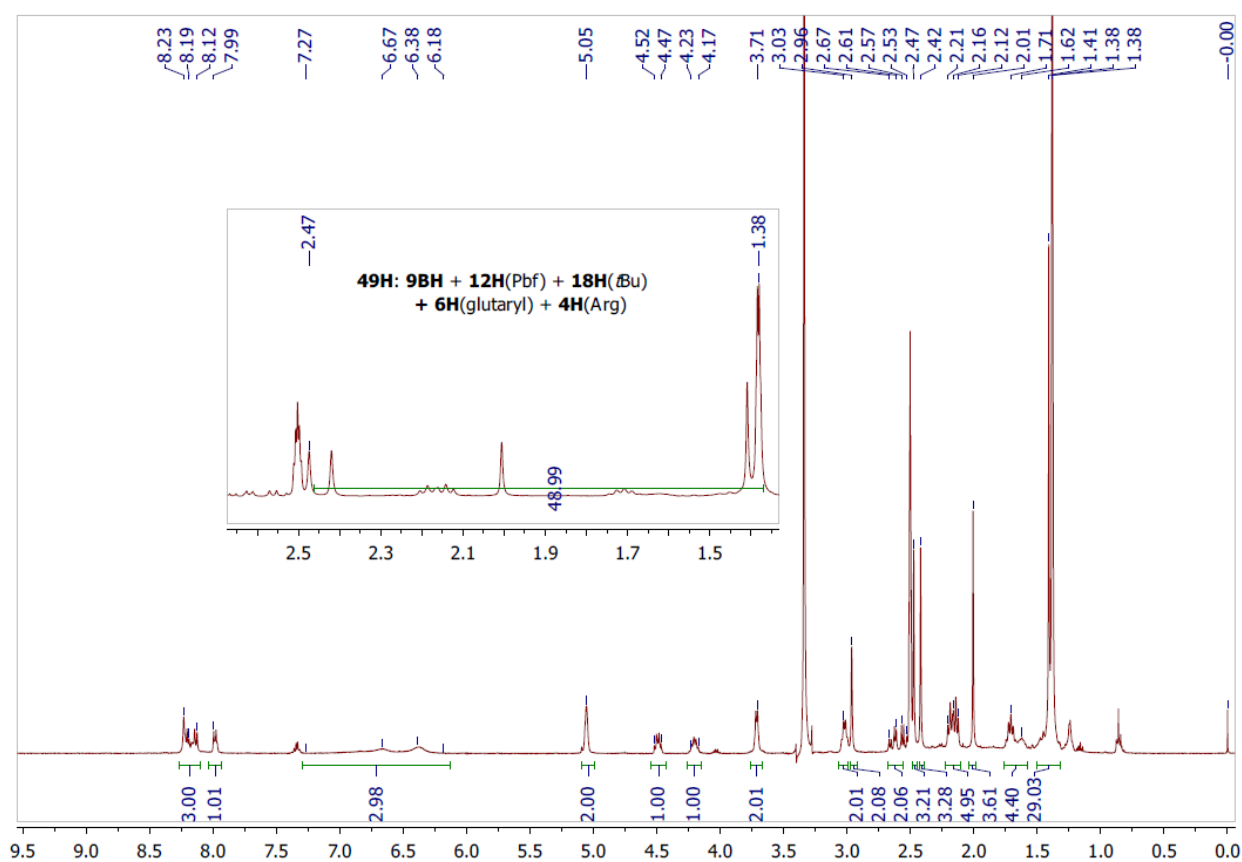

Figure S14. <sup>1</sup>H NMR spectrum of compound **1b**



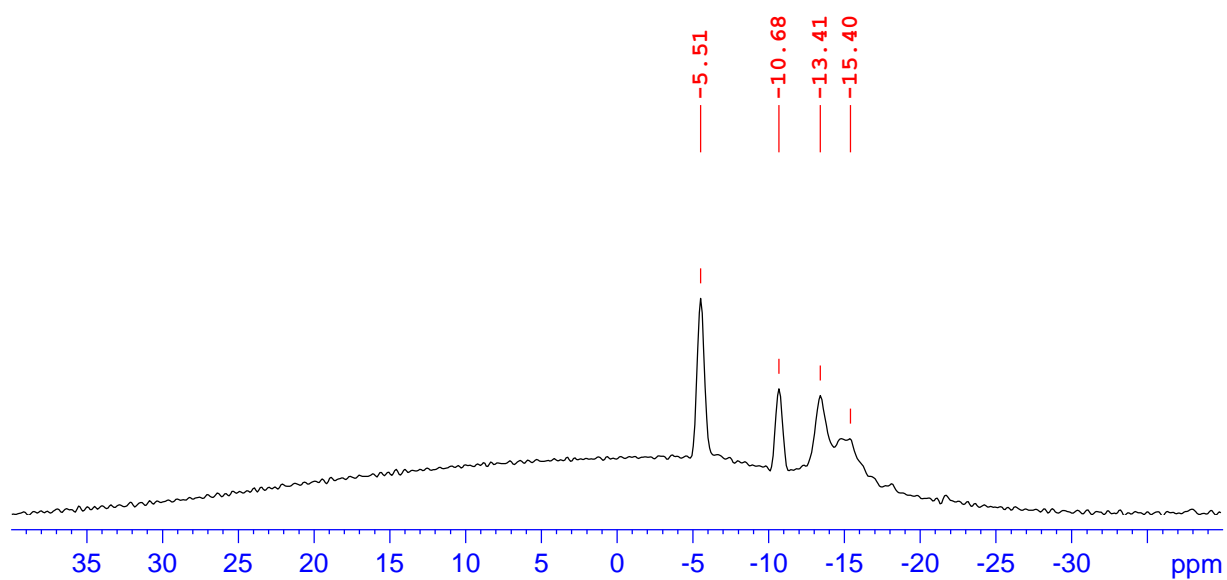

**Figure S15.**  $^{11}\text{B}$  NMR spectrum of compound **1b**

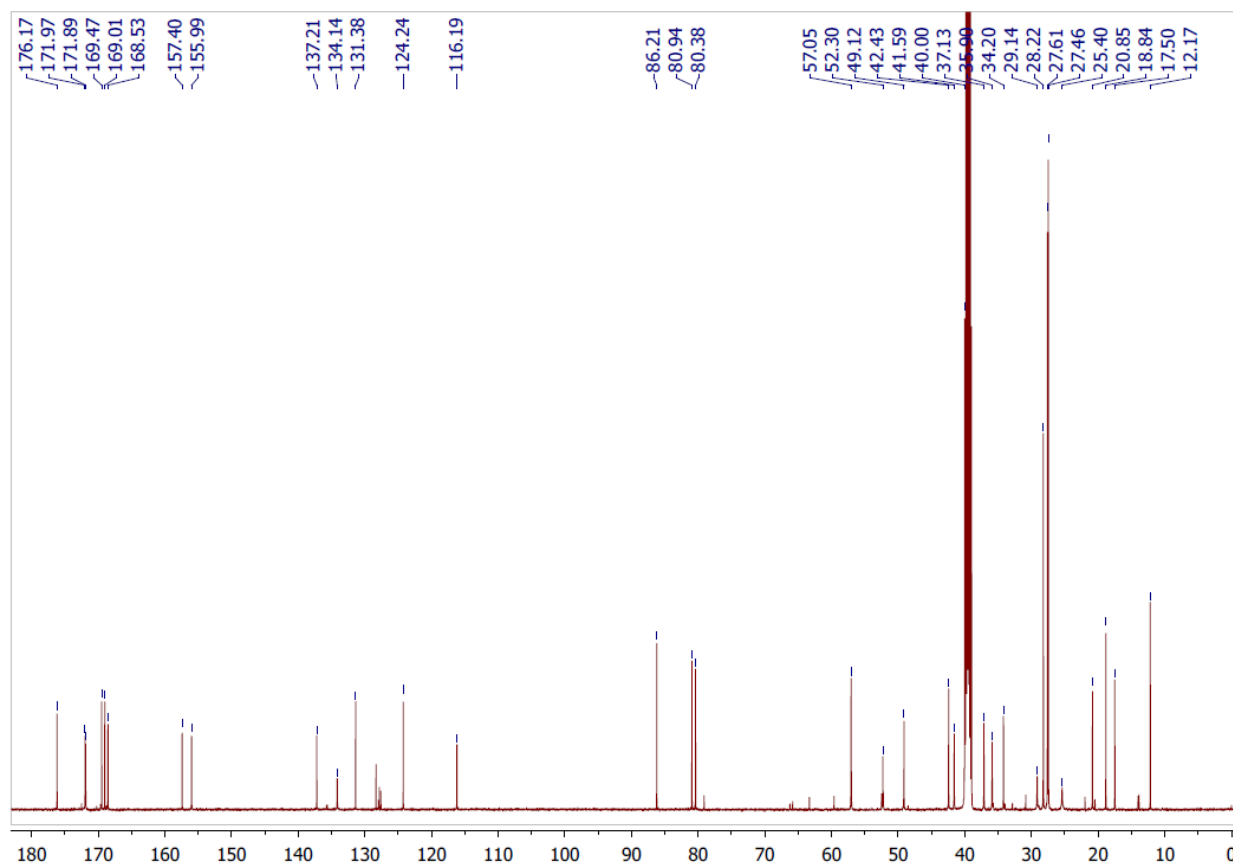

**Figure S16.**  $^{13}\text{C}$  NMR spectrum of compound **1b**

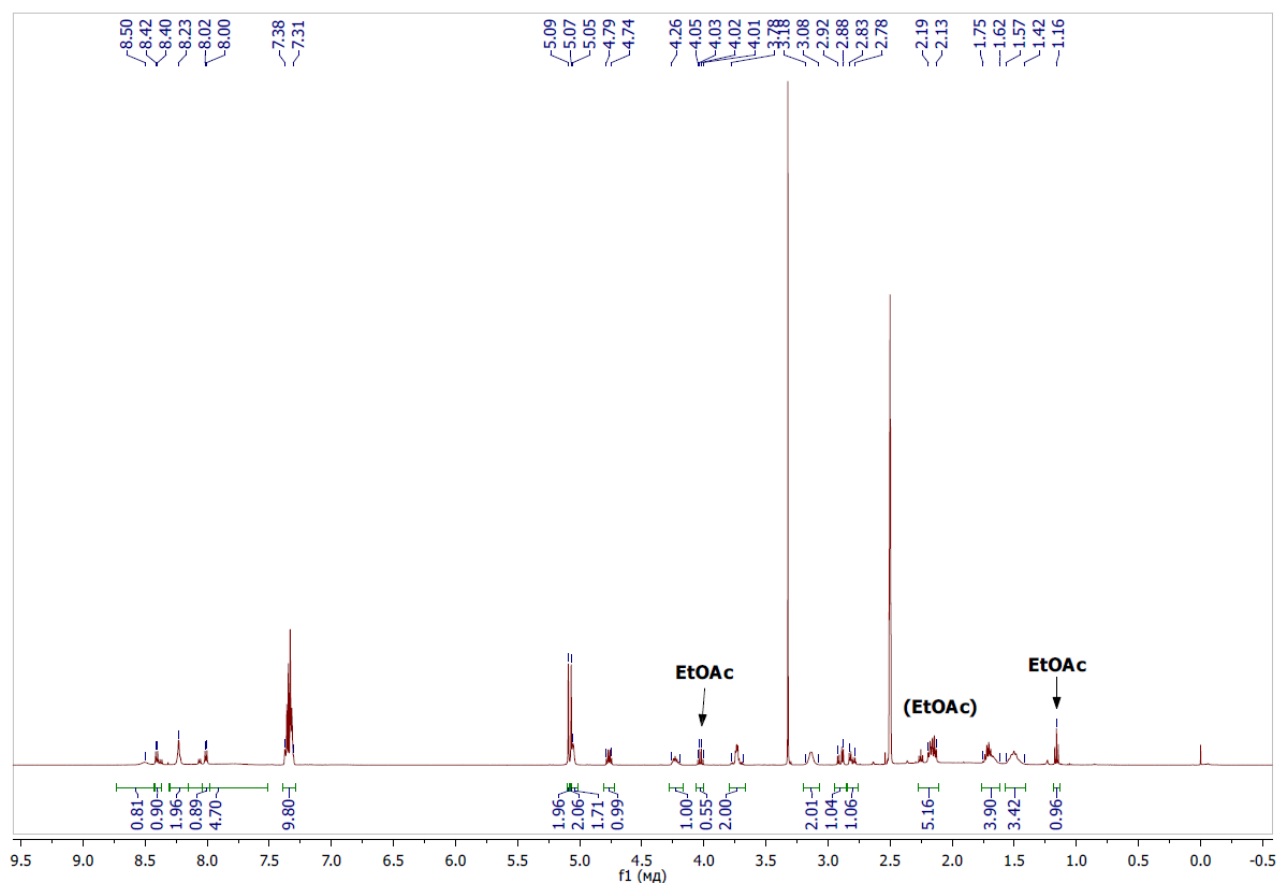

Figure S17.  $^1\text{H}$  NMR spectrum of compound **1c**

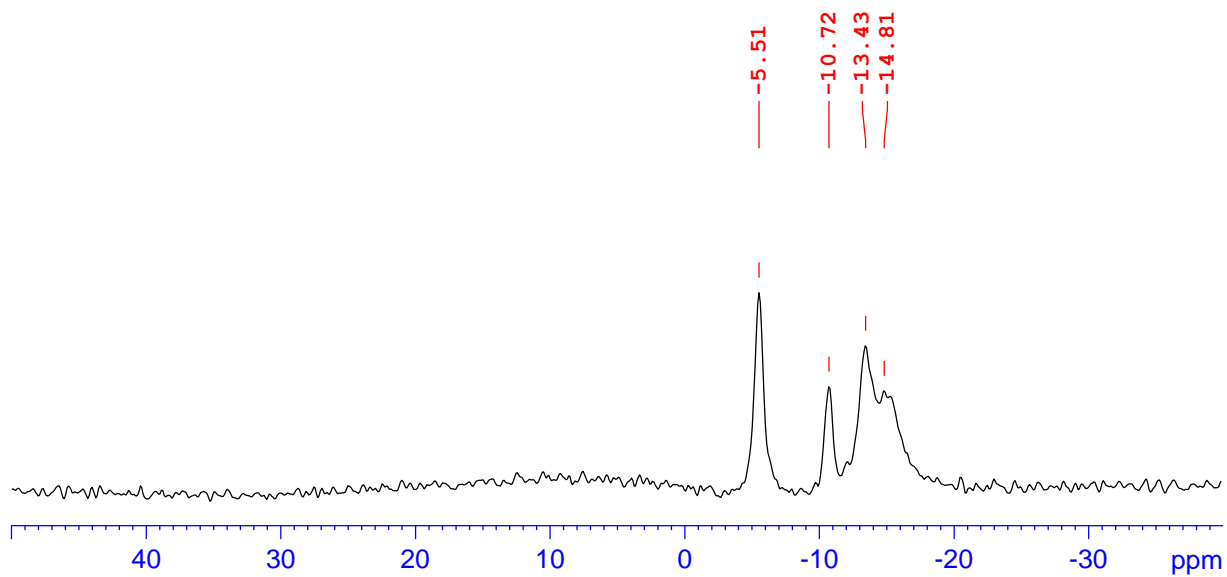

Figure S18.  $^{11}\text{B}$  NMR spectrum of compound **1c**

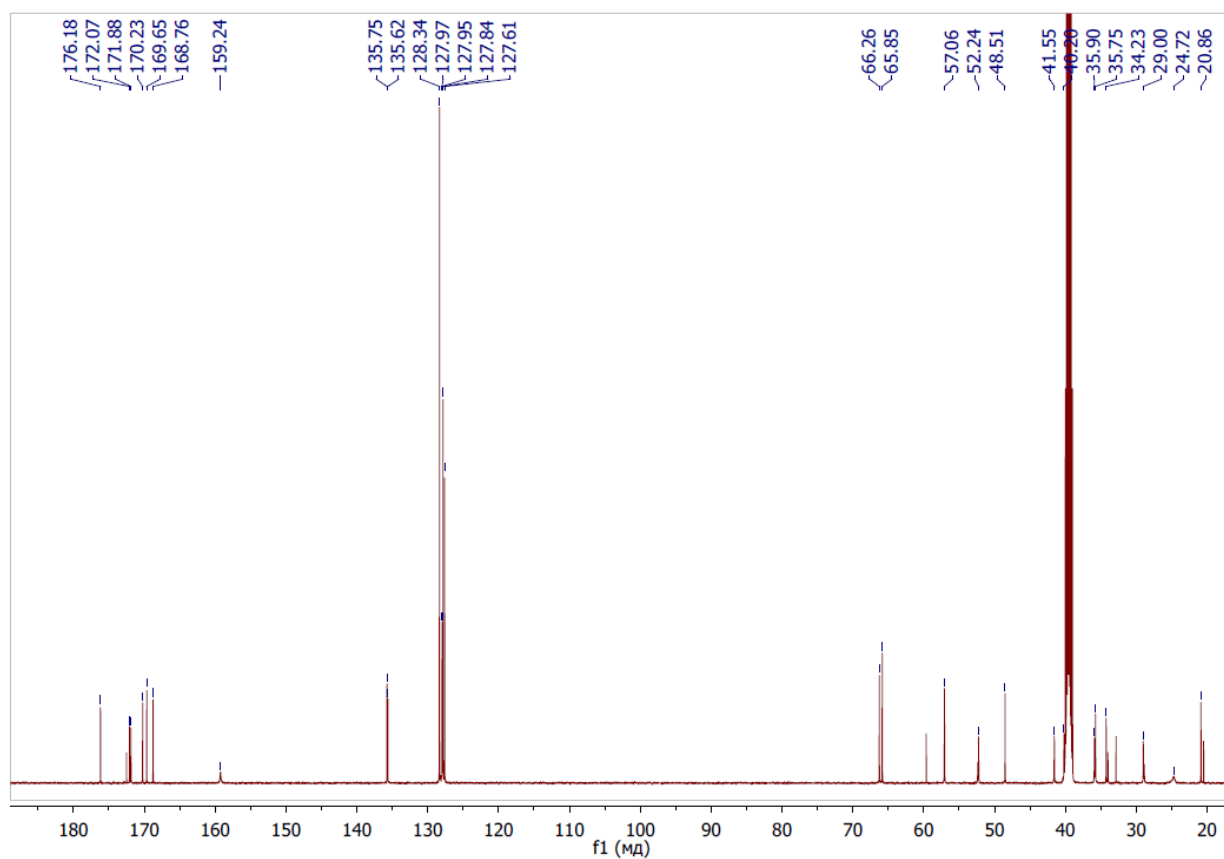

**Figure S19.**  $^{13}\text{C}$  NMR spectrum of compound **1c**

## HPLC Data

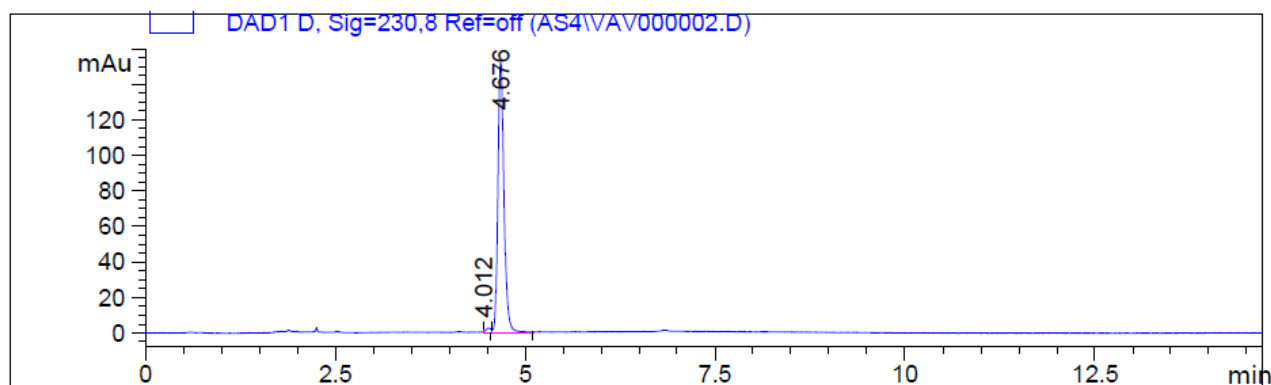

Signal 1: DAD1 D, Sig=230,8 Ref=off

| Peak # | RetTime [min] | Type | Width [min] | Area [mAU*s] | Height [mAU] | Area %  |
|--------|---------------|------|-------------|--------------|--------------|---------|
| 1      | 4.676         | VB   | 0.0870      | 846.00684    | 151.79439    | 98.9607 |
| 2      | 4.012         | VB   | 0.0183      | 8.88488      | 1.55413      | 1.0393  |

Totals : 854.89172 153.34852

**Figure S20.** HPLC of compound **4** (Kromasil 100-5 C18, MeCN–H<sub>2</sub>O 1 : 1, 0.8 mL/min, 35 °C, 230 nm)

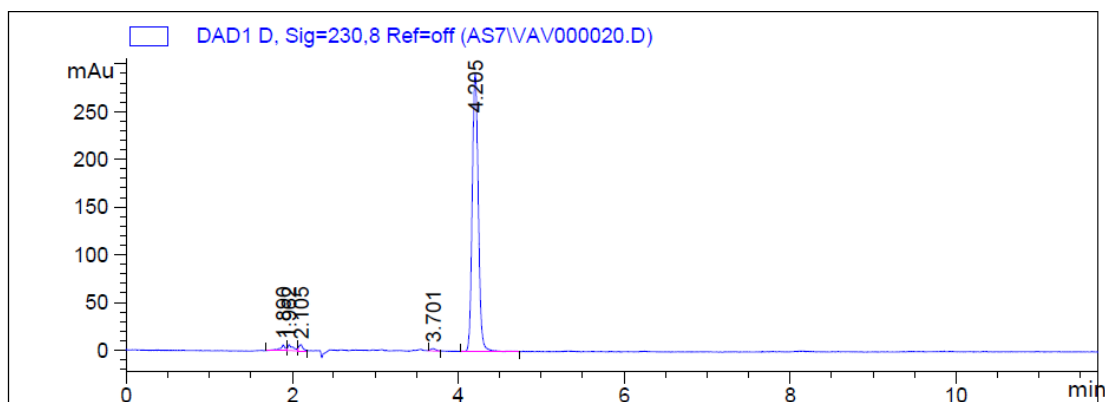

Signal 1: DAD1 D, Sig=230,8 Ref=off

| Peak # | RetTime [min] | Type | Width [min] | Area [mAU*s] | Height [mAU] | Area %  |
|--------|---------------|------|-------------|--------------|--------------|---------|
| 1      | 1.890         | MF   | 0.0719      | 4.41712      | 2.14745      | 0.2807  |
| 2      | 1.962         | FM   | 0.0724      | 4.57223      | 2.31812      | 0.2906  |
| 3      | 2.105         | FM   | 0.0542      | 3.44363      | 2.35420      | 0.2189  |
| 4      | 3.701         | MM   | 0.0744      | 1.64553      | 1.21082      | 0.1046  |
| 5      | 4.205         | BB   | 0.0797      | 1488.84937   | 291.11545    | 99.1052 |

Totals : 1502.92788 299.14604

**Figure S21.** HPLC of compound **6** (Kromasil 100-5 C18, MeCN–H<sub>2</sub>O–AcOH 80: 20 : 0.0025, 0.8 mL/min, 35 °C, 230 nm)

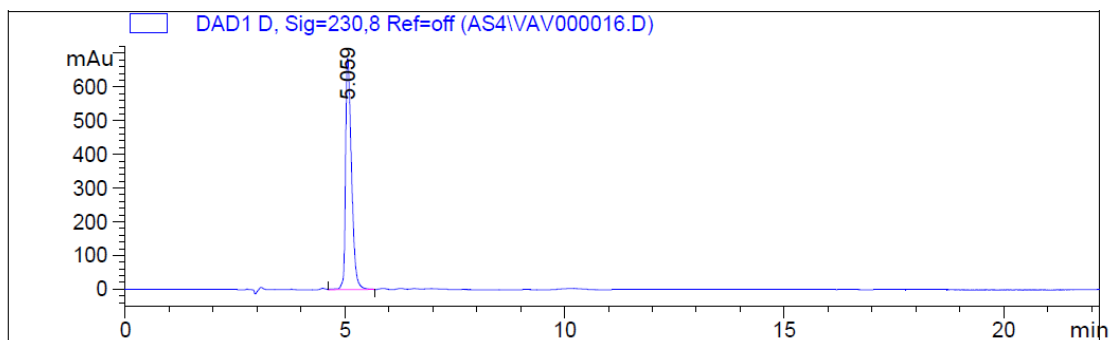

Signal 3: DAD1 D, Sig=230,8 Ref=off

| Peak # | RetTime [min] | Type | Width [min] | Area [mAU*s] | Height [mAU] | Area %   |
|--------|---------------|------|-------------|--------------|--------------|----------|
| 1      | 5.059         | VV   | 0.1459      | 6572.58545   | 685.54456    | 100.0000 |

Totals : 6572.58545 685.54456

**Figure S22.** HPLC of compound **7** (Kromasil 100-5 C18, MeCN–H<sub>2</sub>O–CF<sub>3</sub>CO<sub>2</sub>H 70: 30 : 0.01, 0.8 mL/min, 35 °C, 230 nm)

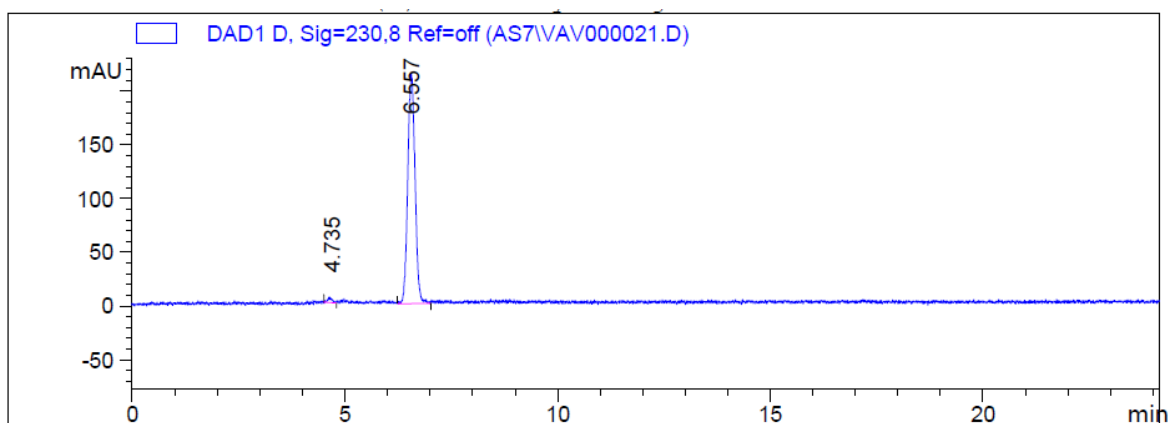

Signal 1: DAD1 D, Sig=230,8 Ref=off

| Peak # | RetTime [min] | Type | Width [min] | Area [mAU*s] | Height [mAU] | Area %  |
|--------|---------------|------|-------------|--------------|--------------|---------|
| 1      | 4.735         | BB   | 0.0710      | 7.65632      | 8.95126      | 0.2990  |
| 2      | 6.557         | BB   | 0.1873      | 2552.85986   | 213.81601    | 99.7010 |

Totals : 2560.51618 222.76727

**Figure S23.** HPLC of compound **2c** (Kromasil 100-5 C18, MeCN–H<sub>2</sub>O–AcOH 60 : 40 : 0.005, 0.8 mL/min, 35 °C, 230 nm)

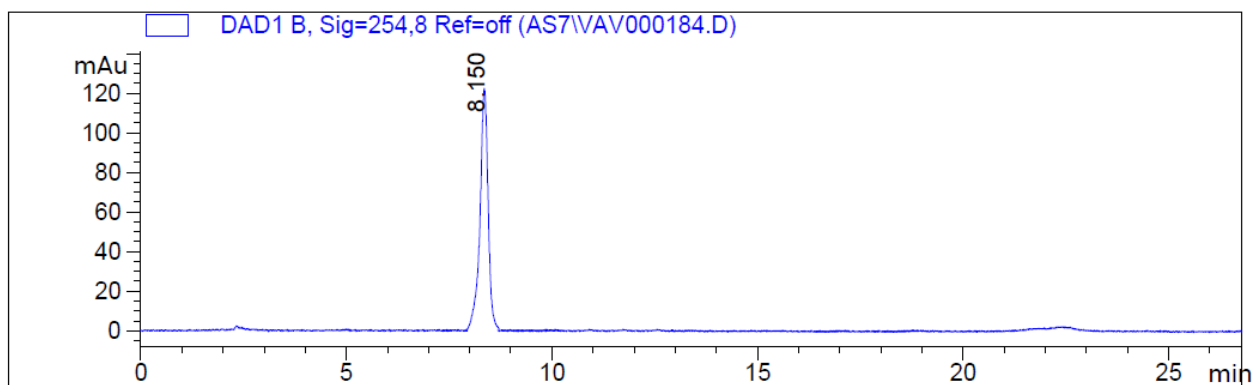

Signal 1: DAD1 B, Sig=254,8 Ref=off

| Peak # | RetTime [min] | Type | Width [min] | Area [mAU*s] | Height [mAU] | Area %   |
|--------|---------------|------|-------------|--------------|--------------|----------|
| 1      | 8.150         | VB   | 0.2490      | 2318.23071   | 131.92964    | 100.0000 |

Totals : 2318.23071 131.92964

**Figure S24.** HPLC of compound **1a** (Kromasil 100-5 C18, MeCN–H<sub>2</sub>O 1 : 1, 0.8 mL/min, 35 °C, 254 nm)

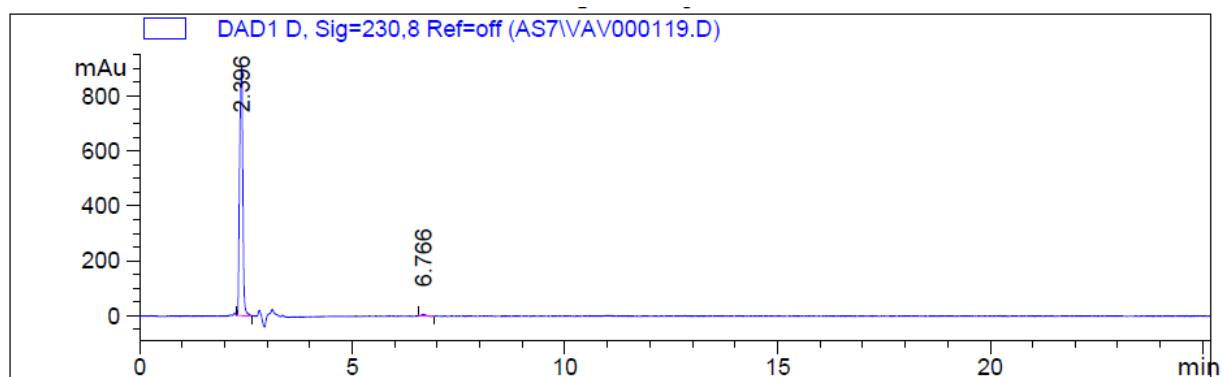

Signal 1: DAD1 D, Sig=230,8 Ref=off

| Peak # | RetTime [min] | Type | Width [min] | Area [mAU*s] | Height [mAU] | Area %  |
|--------|---------------|------|-------------|--------------|--------------|---------|
| 1      | 2.396         | BB   | 0.0862      | 4706.64990   | 910.28558    | 99.7007 |
| 2      | 6.766         | BB   | 0.0644      | 14.12896     | 2.73546      | 0.2993  |

Totals : 4720.77886 913.02104

**Figure S25.** HPLC of compound **1b** (Kromasil 100-5 C18, MeCN–H<sub>2</sub>O–AcOH 40 : 60 : 0.0025, 0.8 mL/min, 35 °C, 230 nm)

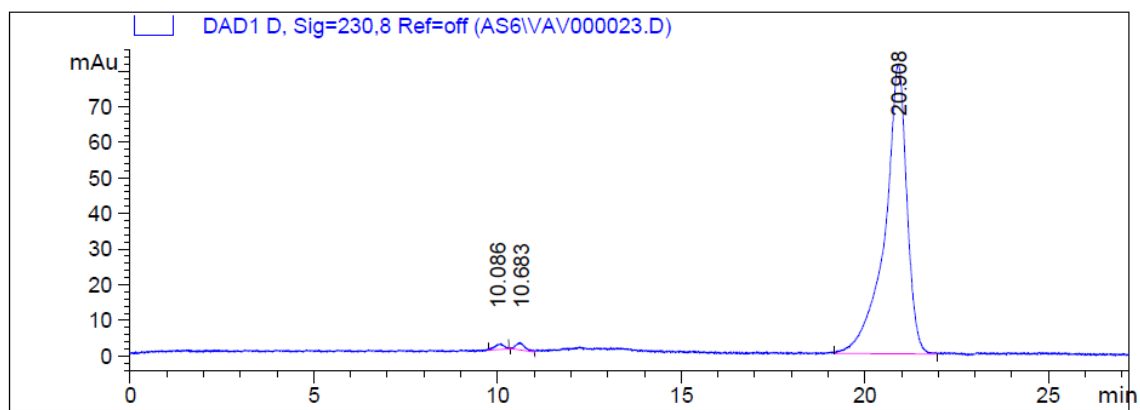

Signal 2: DAD1 D, Sig=230,8 Ref=off

| Peak # | RetTime [min] | Type | Width [min] | Area [mAU*s] | Height [mAU] | Area %  |
|--------|---------------|------|-------------|--------------|--------------|---------|
| 1      | 10.086        | BV   | 0.1274      | 16.88312     | 4.01685      | 0.4941  |
| 1      | 10.683        | BV   | 0.1486      | 23.63285     | 4.56981      | 0.6917  |
| 1      | 20.908        | BB   | 0.5838      | 3376.25488   | 81.08988     | 98.8142 |

Totals : 3416.77085 89.67654

**Figure S26.** HPLC of compound **1c** (Kromasil 100-5 C18, MeCN–0.06 M phosphate buffer solution (pH 7.0) 8 : 2, 0.8 mL/min, 35 °C, 230 nm)
